# Supplementary material for: Evaluating offspring Genomic and Epigenomic alterations after prenatal exposure to Cancer treatment In Pregnancy (GE-CIP): a multicentric observational study
Source: HighWire-hosted journal article supplement (doi:10.1136/bmjopen-2023-081833), 2024-03-01
Supplement: bmjopen-2023-081833supp001_data_supplement.pdf [file bmjopen-2023-081833supp001_data_supplement.pdf]

Supplementary 1

Questionnaire protocol GE-CIP study (S62388)

Patient ID: .....  
Date:.....

1. Do you smoke or have you ever smoked?

- ☐ Never
- ☐ I quit smoking before I got pregnant
- ☐ I smoked during my pregnancy; amount: ..... cigarettes/week

2. Did you or someone else smoke indoors during your pregnancy?

- ☐ No
- ☐ Yes

3. Did you take any medication/supplements/vitamins during your pregnancy?  
(E.g. folic acid, vitamin D, zinc supplements)

- ☐ No
- ☐ Yes

If yes, please enter the details in the table below:

| Medication/vitamin/supplement | Pregnancy timeframe        |
|-------------------------------|----------------------------|
|                               | week..... up to week ..... |

4. Do you drink or have you drunk alcohol during your pregnancy?

- ☐ Never
- ☐ Very occasionally
- ☐ More frequently, in particular ..... units/week

5. Have you been ill (other than cancer) during your pregnancy?

- ☐ No
- ☐ Yes, in particular: .....

6. Have you gone through a major change during your pregnancy (other than the cancer diagnosis),  
such as divorce, moving house, passing of someone close to you...

- ☐ No
- ☐ Yes, in particular: .....

7. What is the highest level of education you and your partner attained? (a completed course with degree or certificate)

| Mother                                                                                                                                                                                                              | Father                                                                                                                                                                                                              |
|---------------------------------------------------------------------------------------------------------------------------------------------------------------------------------------------------------------------|---------------------------------------------------------------------------------------------------------------------------------------------------------------------------------------------------------------------|
| <input type="checkbox"/> Primary school<br><input type="checkbox"/> Secondary school<br><input type="checkbox"/> Bachelor degree<br><input type="checkbox"/> Master degree<br><input type="checkbox"/> Other: ..... | <input type="checkbox"/> Primary school<br><input type="checkbox"/> Secondary school<br><input type="checkbox"/> Bachelor degree<br><input type="checkbox"/> Master degree<br><input type="checkbox"/> Other: ..... |

8. In which country were you and your partner born?

Mother: .....  
Father: .....

Mother

Age: ..... years  
Height: ..... cm  
Weight before getting pregnant: ..... kg

Father

Age: ..... years

Child

This is my ☐ first ☐ second ☐ third ☐ ..... child

Your baby's sex: ☐ girl ☐ boy

Delivery: ☐ spontaneous and vaginal ☐ induced (vaginal) ☐ planned caesarean section ☐ emergency caesarean

Season in which the baby was delivered: ☐ winter ☐ spring ☐ summer ☐ autumn

Gestation at the time of delivery: ..... weeks and ..... days
